# Supplementary material for: Pseudomonas fluorescens Complex and Its Intrinsic, Adaptive, and Acquired Antimicrobial Resistance Mechanisms in Pristine and Human-Impacted Sites
Source: MDPI journal article supplement (doi:10.3390/antibiotics11080985), 2022-07-22
Supplement: s1 [file s1]

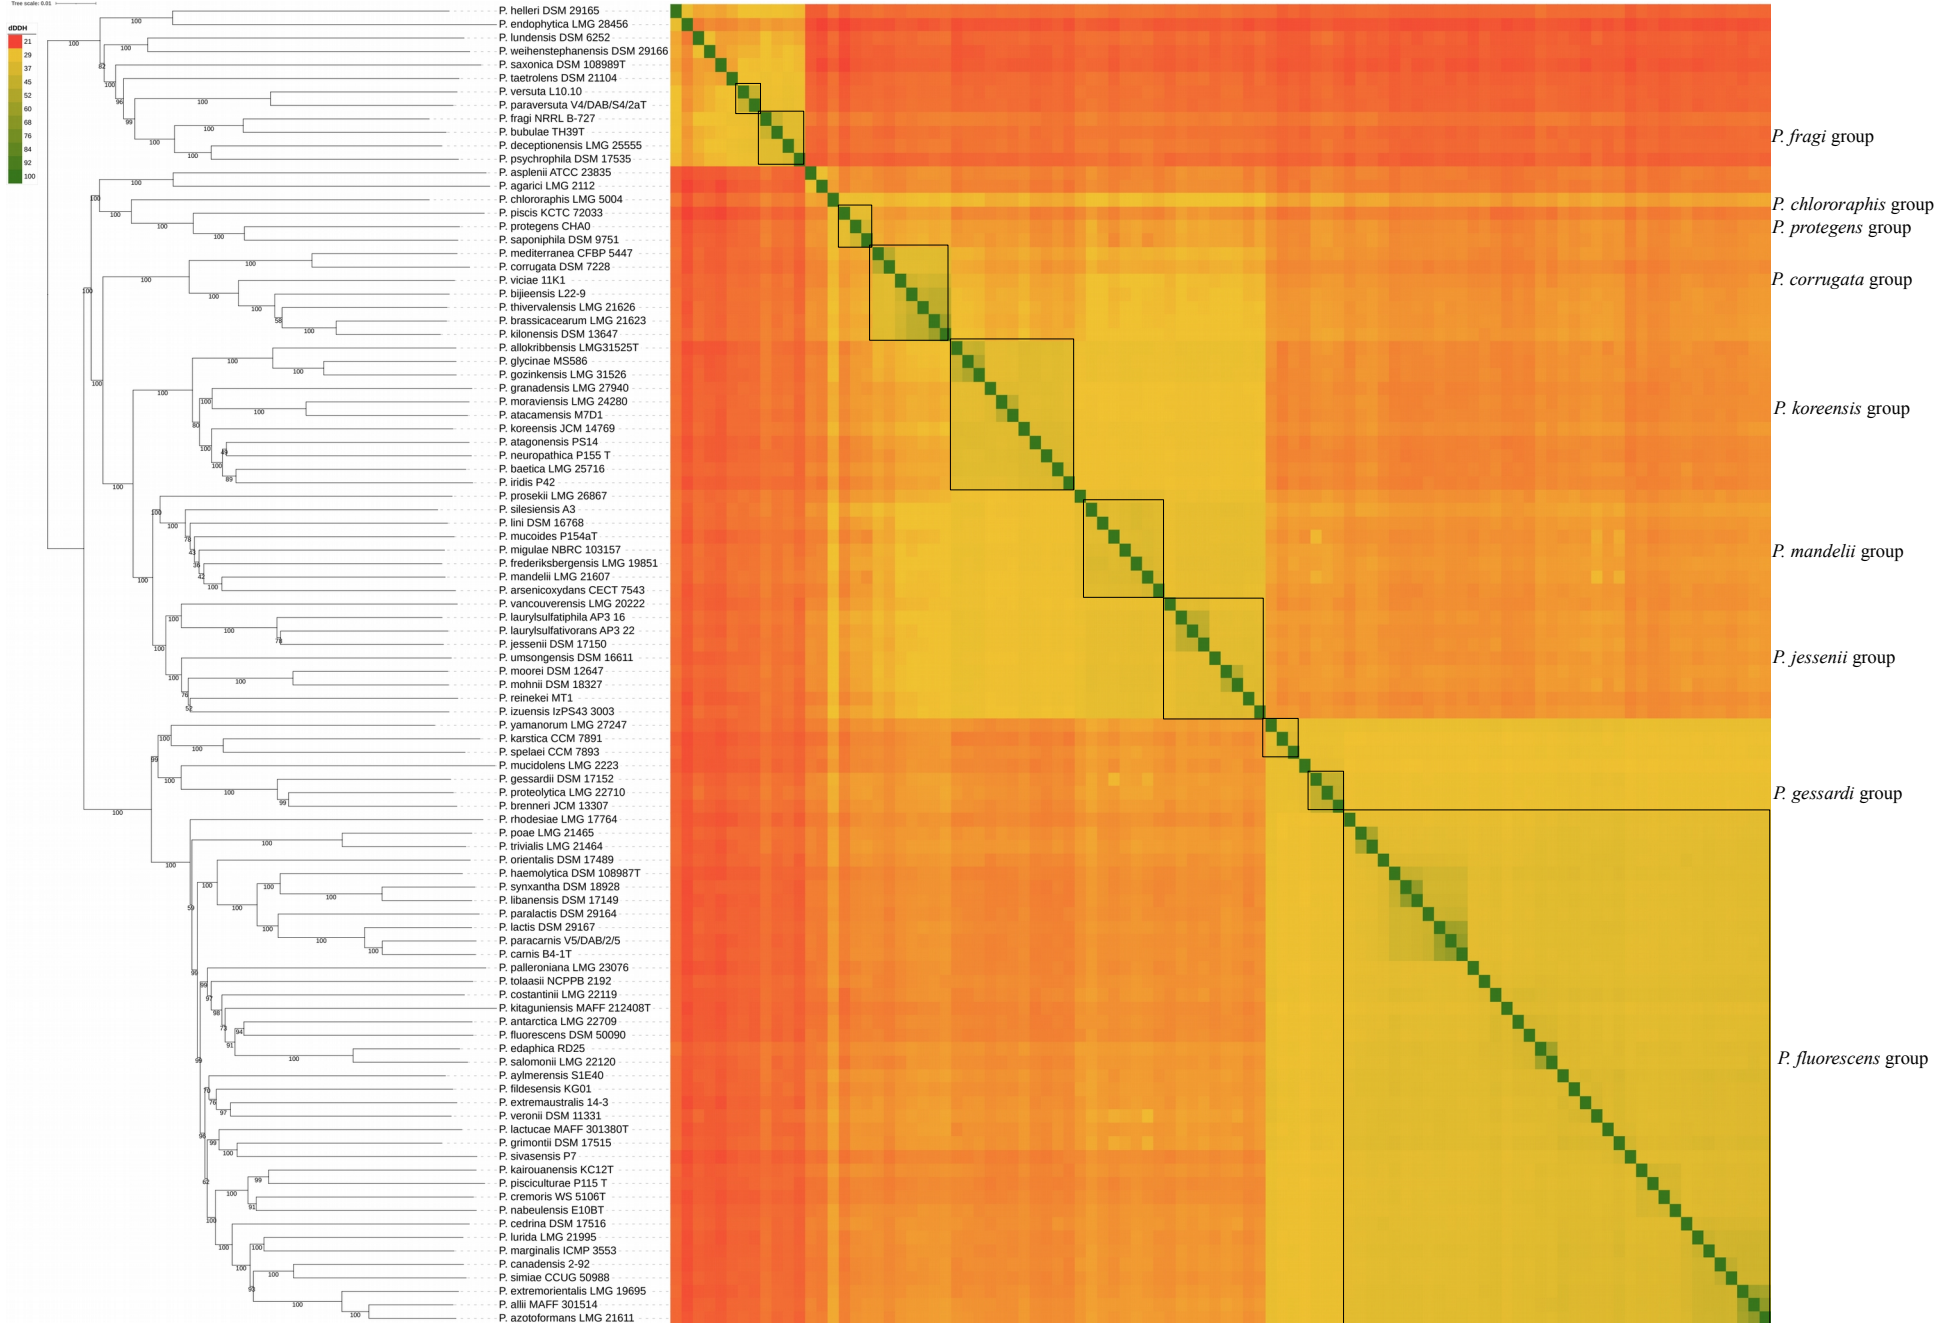

**Figure S1.** Phylogenomic tree of the 98 species belonging to the *P. fluorescens* complex and heatmap representing the digital DDH estimation (dDDH) between genomes. Black squares delimit the species belonging to the same group. The groups already described in the literature are indicated next to the heatmap.
