# Supplementary material for: Pseudomonas fluorescens Complex and Its Intrinsic, Adaptive, and Acquired Antimicrobial Resistance Mechanisms in Pristine and Human-Impacted Sites
Source: Antibiotics (Basel). 2022 Jul 22;11(8):985. doi: 10.3390/antibiotics11080985 (PMC9331890; doi:10.3390/antibiotics11080985)
Supplement: Supplementary file 1 [file antibiotics-11-00985-s001.zip › dDDH_Table_S1.xlsx]

## Sheet: Sheet1
		P. helleri	P. endophytica	P. lundensis	P. weihenstephanensis	P. saxonica	P. taetrolens	P. versuta	P. paraversuta	P. fragi	P. bubulae	P. deceptionensis	P. psychrophila	P. asplenii	P. agarici	P. chlororaphis	P. piscis	P. protegens	P. saponiphila	P. mediterranea	P. corrugata	P. viciae	P. bijieensis	P. thivervalensis	P. brassicacearum	P. kilonensis	P. allokribbensis	P. glycinae	P. gozinkensis	P. granadensis	P. moraviensis	P. atacamensis	P. koreensis	P. atagonensis	P. neuropathica	P. baetica	P. iridis	P. prosekii	P. silesiensis	P. lini	P. mucoides	P. migulae	P. frederiksbergensis	P. mandelii	P. arsenicoxydans	P. vancouverensis	P. laurylsulfatiphila	P. laurylsulfativorans	P. jessenii
P. helleri DSM 29165	GCF_001043025	100	30.2	25.9	26.1	25.7	26.3	27.2	27.3	27.8	27	27.8	26.7	22.7	22.7	23.9	22.8	23.4	23.4	23.7	23.4	23.3	23.6	23.6	23.7	23.7	23.4	23.5	23.5	23.4	23.6	23.5	23.6	23.3	23.4	23.5	23.4	23.9	23.9	23.8	23.4	23.6	23.7	23.8	23.6	23.4	23.7	23.6	23.4
P. endophytica LMG 28456	GCF_001411475	30.2	100	24	24.7	24.4	24.6	25.1	24.9	25.6	25.2	25.5	25.4	22.1	21.6	22.3	21.5	22.1	22.3	22.3	22.2	22.7	22.6	22.3	22.5	22.9	22.1	22.4	22.3	22.4	22.4	22.4	22.5	22.2	22.4	22.7	22.2	23	22.7	22.5	22.3	22.9	22.9	22.7	22.4	22.5	22.7	22.5	22.6
P. lundensis DSM 6252	GCF_001042985	25.9	24	100	28.7	25.6	25.6	25.9	25.9	27.2	26.3	26.5	26	22.5	22.2	23.4	22.2	22.8	23	23.3	23.1	23.3	23.2	23.5	23.5	23.7	22.5	23	23.2	23.1	23.2	23.2	23.4	23	23.1	23.1	22.9	23.5	23.6	23.5	23.3	23.7	23.5	23.7	23.1	23.1	23.5	23.3	23.6
P. weihenstephanensis DSM 29166	GCF_001043055	26.1	24.7	28.7	100	25.5	26	26.4	26.4	27.3	26.6	27.2	26.7	22.6	22.4	23.1	22	22.7	22.9	22.8	22.8	23.1	23.2	23.2	23.2	23.2	22.4	22.5	22.6	23	23.1	23	23	22.7	22.7	23.2	22.8	23.2	23.4	23.3	22.8	23.2	23.3	23.2	22.9	22.8	23.1	23	23.2
P. saxonica DSM 108989T	GCF_007858365	25.7	24.4	25.6	25.5	100	25.7	27	26.9	27.5	26.9	27.1	26.7	22.5	21.8	22.7	21.7	22.5	22.7	22.8	22.7	22.9	22.9	23	22.9	23.1	22.4	22.7	22.7	22.9	22.8	22.6	22.6	22.6	22.6	22.9	22.7	23.3	23.1	23.1	22.6	23.1	23	23.1	22.8	22.7	23	22.8	23.1
P. taetrolens DSM 21104	GCF_001042915	26.3	24.6	25.6	26	25.7	100	27.6	27.7	28.5	27.6	28.5	28.3	23	22.5	23.6	22.4	23	23.1	23.4	23.3	23.5	23.6	23.5	23.6	23.7	22.9	23.2	23.2	23.2	23.3	23.4	23.4	23	23.1	23.4	23.1	23.6	23.9	23.8	23.2	23.7	23.8	23.7	23.5	23.2	23.7	23.6	23.8
P. versuta L10.10	GCA_001294575	27.2	25.1	25.9	26.4	27	27.6	100	43.3	28.9	28.2	29.9	28.6	23.1	22.8	23.5	22.6	23.3	23.3	23.4	23.2	23.4	23.6	23.5	23.5	23.6	23.2	23.4	23.2	23.5	23.4	23.4	23.4	23.2	23.3	23.4	23.1	23.9	23.7	23.7	23.4	23.6	23.6	23.9	23.7	23.3	23.5	23.4	23.4
P. paraversuta V4/DAB/S4/2aT	GCF_904063065	27.3	24.9	25.9	26.4	26.9	27.7	43.3	100	29.3	28.8	30.1	28.9	23.1	22.8	23.8	22.7	23.4	23.3	23.5	23.3	23.5	23.7	23.6	23.6	23.7	23.2	23.3	23.3	23.4	23.5	23.3	23.4	23	23.3	23.4	23.1	23.7	24	23.8	23.4	23.7	23.8	23.8	23.5	23.4	23.6	23.3	23.5
P. fragi NRRL B-727	GCA_900105835	27.8	25.6	27.2	27.3	27.5	28.5	28.9	29.3	100	42	33.2	33.2	24	23.4	24.6	23.5	24.2	24.4	23.9	23.6	24.1	24	24.2	24.3	24.4	24.2	24.2	24.2	24.1	24.2	24	24.1	24	23.7	23.8	23.6	24.4	24.5	24.1	23.9	24.2	24.2	24.4	24.3	24	24.2	24.1	24
P. bubulae TH39T	GCA_900618535	27	25.2	26.3	26.6	26.9	27.6	28.2	28.8	42	100	32.9	32.9	23.2	23.1	24	22.9	23.7	23.7	23.3	23.1	23.6	23.7	23.8	23.6	23.9	23.5	23.7	23.6	23.6	23.8	23.5	24	23.4	23.6	23.8	23.4	23.9	23.9	23.9	23.8	23.8	23.8	23.9	23.7	23.6	23.9	23.6	23.7
P. deceptionensis LMG 25555	GCA_900106095	27.8	25.5	26.5	27.2	27.1	28.5	29.9	30.1	33.2	32.9	100	36.2	23.2	22.9	24.1	23.1	23.7	23.8	23.6	23.5	24	23.8	24	24.1	24.1	23.4	23.7	23.7	23.8	24	23.7	23.9	23.6	23.5	23.9	23.4	24.1	24.1	24.2	23.8	24.2	24.3	24.4	23.9	23.9	24.1	24	24
P. psychrophila DSM 17535	GCF_001043005	26.7	25.4	26	26.7	26.7	28.3	28.6	28.9	33.2	32.9	36.2	100	22.7	22.7	23.6	22.6	23.1	23.2	23	22.8	23	23.1	23.2	23.5	23.3	23	23.1	23.1	23.3	23.2	23.1	23.4	23.2	23.1	23.1	23.2	23.5	23.6	23.8	23.3	23.5	23.8	24.1	23.6	23.1	23.4	23.5	23.5
P. asplenii ATCC 23835	GCA_900105475	22.7	22.1	22.5	22.6	22.5	23	23.1	23.1	24	23.2	23.2	22.7	100	29	25.8	24.4	25	25.1	24.6	24.4	24.5	24.9	25.1	25.1	25	24.1	24.5	24.4	24.5	24.6	24.6	24.7	24.2	24.1	24.6	24.1	24.4	25.1	24.6	24.2	24.3	24.6	24.5	24.2	24.6	25.1	24.8	25
P. agarici LMG 2112	GCA_900109755	22.7	21.6	22.2	22.4	21.8	22.5	22.8	22.8	23.4	23.1	22.9	22.7	29	100	25.6	24.4	25.1	25	24.7	24.4	24.4	24.9	24.9	24.9	25	24	24.3	24.3	24.3	24.3	24.2	24.5	23.9	23.9	24.3	23.7	24.4	24.8	24.6	24.2	24.6	24.6	24.7	24.3	24.5	25	24.8	24.8
P. chlororaphis LMG 5004	GCA_001269625	23.9	22.3	23.4	23.1	22.7	23.6	23.5	23.8	24.6	24	24.1	23.6	25.8	25.6	100	27.9	29.1	28.9	26.9	26.5	26.7	26.9	27	26.8	27.2	26.5	26.7	26.8	26.1	26.2	26.2	26.7	26	25.8	26.1	25.7	26.4	27.5	27	26.4	27	27.1	26.7	26.4	26.8	27.4	27.2	27.3
P. piscis KCTC 72033	GCA_009380155	22.8	21.5	22.2	22	21.7	22.4	22.6	22.7	23.5	22.9	23.1	22.6	24.4	24.4	27.9	100	31.9	31.8	25.6	25.2	25.1	25.6	25.6	25.5	25.7	24.2	24.6	24.5	24.5	24.7	24.5	24.8	24	24.1	24.4	23.9	24.5	25.4	24.7	24.2	24.9	24.8	24.5	24.3	24.8	25.6	25.1	25.4
P. protegens CHA0	GCA_000397205	23.4	22.1	22.8	22.7	22.5	23	23.3	23.4	24.2	23.7	23.7	23.1	25	25.1	29.1	31.9	100	38.9	26	25.6	25.8	26.1	26.2	26	26.2	25.1	25.4	25.3	25.3	25.4	25.2	25.4	24.7	24.6	25.1	24.6	25.3	26.4	25.5	25	25.6	25.9	25.5	25.3	25.6	26.3	25.9	26.1
P. saponiphila DSM 9751	GCA_900105185	23.4	22.3	23	22.9	22.7	23.1	23.3	23.3	24.4	23.7	23.8	23.2	25.1	25	28.9	31.8	38.9	100	26.2	25.6	26	26.2	26.4	26	26.3	25.3	25.4	25.6	25.1	25.5	25.3	25.7	24.9	24.8	25.2	24.7	25.4	26.3	25.7	24.6	25.5	25.8	24.9	25.3	25.6	26.1	25.8	26
P. mediterranea CFBP 5447	GCA_000774145	23.7	22.3	23.3	22.8	22.8	23.4	23.4	23.5	23.9	23.3	23.6	23	24.6	24.7	26.9	25.6	26	26.2	100	49.1	33.4	33.2	33.2	33.5	34	26.5	26.5	26.3	25.6	25.7	25.8	26.2	25.7	25.3	25.7	25.4	25.7	26.9	26.5	26.1	26.4	26.3	26.4	26.3	26.5	26.8	26.6	26.5
P. corrugata DSM 7228	GCA_001269905	23.4	22.2	23.1	22.8	22.7	23.3	23.2	23.3	23.6	23.1	23.5	22.8	24.4	24.4	26.5	25.2	25.6	25.6	49.1	100	32.7	32.6	32.5	33	33.1	26.1	26	25.9	25.3	25.5	25.4	25.8	25.4	24.9	25.2	25	25.4	26.4	25.9	25.8	26.2	26.1	26	25.9	26	26.3	26.2	26
P. viciae 11K1	GCA_004786035	23.3	22.7	23.3	23.1	22.9	23.5	23.4	23.5	24.1	23.6	24	23	24.5	24.4	26.7	25.1	25.8	26	33.4	32.7	100	40.5	37.6	39.4	39.8	26.5	26.5	26.5	25.9	25.9	25.9	26.4	25.7	25.6	25.9	25.6	26.3	27.4	27.1	26.7	27	27.2	27	26.9	26.5	27	26.8	26.8
P. bijieensis L22-9	GCA_013347965	23.6	22.6	23.2	23.2	22.9	23.6	23.6	23.7	24	23.7	23.8	23.1	24.9	24.9	26.9	25.6	26.1	26.2	33.2	32.6	40.5	100	43.3	46.6	46.3	26.9	26.7	26.6	26	26.3	26.2	26.5	25.9	25.8	26	25.6	26.2	27.3	27	26.5	26.7	27	26.9	26.8	26.6	27.1	26.7	26.8
P. thivervalensis LMG 21626	GCA_001637285	23.6	22.3	23.5	23.2	23	23.5	23.5	23.6	24.2	23.8	24	23.2	25.1	24.9	27	25.6	26.2	26.4	33.2	32.5	37.6	43.3	100	46.3	47.3	26.9	26.9	26.7	26.2	26.2	26.2	26.8	26.2	25.9	26.1	25.8	26.3	27.5	27.1	26.6	27	27.3	26.8	26.8	26.6	27.4	27	26.9
P. brassicacearum LMG 21623	GCF_900103245	23.7	22.5	23.5	23.2	22.9	23.6	23.5	23.6	24.3	23.6	24.1	23.5	25.1	24.9	26.8	25.5	26	26	33.5	33	39.4	46.6	46.3	100	59	26.9	26.8	26.6	26	26.1	26	26.6	26	25.8	26.1	25.7	26.4	27.5	27.1	26.7	27.1	27.4	26.9	26.8	26.9	27.3	27.1	27
P. kilonensis DSM 13647	GCA_001269885	23.7	22.9	23.7	23.2	23.1	23.7	23.6	23.7	24.4	23.9	24.1	23.3	25	25	27.2	25.7	26.2	26.3	34	33.1	39.8	46.3	47.3	59	100	27.2	27.2	26.9	26.2	26.4	26.3	27.1	26.3	26	26.1	26.2	26.6	27.6	27.4	27	27.2	27.4	27.2	27	26.9	27.5	27.2	27
P. allokribbensis LMG31525T	GCA_014863605	23.4	22.1	22.5	22.4	22.4	22.9	23.2	23.2	24.2	23.5	23.4	23	24.1	24	26.5	24.2	25.1	25.3	26.5	26.1	26.5	26.9	26.9	26.9	27.2	100	43	44.2	32	32.1	32.3	34.6	34.2	33.2	33.8	32.7	29	29.7	29.4	28.8	29.8	29.5	29.4	29	28.9	30	29.7	29.9
P. glycinae MS586	GCA_001594225	23.5	22.4	23	22.5	22.7	23.2	23.4	23.3	24.2	23.7	23.7	23.1	24.5	24.3	26.7	24.6	25.4	25.4	26.5	26	26.5	26.7	26.9	26.8	27.2	43	100	53.2	31.6	31.7	32	34.3	34	32.7	33.3	32.5	28.4	29.4	29.1	28.6	29.3	29.1	28.9	28.6	28.9	29.7	29.5	29.7
P. gozinkensis LMG 31526	GCA_014863585	23.5	22.3	23.2	22.6	22.7	23.2	23.2	23.3	24.2	23.6	23.7	23.1	24.4	24.3	26.8	24.5	25.3	25.6	26.3	25.9	26.5	26.6	26.7	26.6	26.9	44.2	53.2	100	31.6	31.6	31.9	34.1	34.1	32.5	33.1	32.5	28.4	29.2	29	28.7	29.3	29.4	29	28.7	28.9	29.4	29.2	29.4
P. granadensis LMG 27940	GCA_900105485	23.4	22.4	23.1	23	22.9	23.2	23.5	23.4	24.1	23.6	23.8	23.3	24.5	24.3	26.1	24.5	25.3	25.1	25.6	25.3	25.9	26	26.2	26	26.2	32	31.6	31.6	100	34	34.3	33.1	33	34.3	33	32	27.5	27.6	27.5	27.4	27.8	27.8	27.4	27.5	27.6	27.9	27.9	28
P. moraviensis LMG 24280	GCF_900105805	23.6	22.4	23.2	23.1	22.8	23.3	23.4	23.5	24.2	23.8	24	23.2	24.6	24.3	26.2	24.7	25.4	25.5	25.7	25.5	25.9	26.3	26.2	26.1	26.4	32.1	31.7	31.6	34	100	47	33	32.8	33.5	32.9	32	27.7	27.8	27.4	27.4	27.8	27.8	27.6	27.6	27.9	28	28	28
P. atacamensis M7D1	GCA_004801935	23.5	22.4	23.2	23	22.6	23.4	23.4	23.3	24	23.5	23.7	23.1	24.6	24.2	26.2	24.5	25.2	25.3	25.8	25.4	25.9	26.2	26.2	26	26.3	32.3	32	31.9	34.3	47	100	33.1	33	33.7	33.1	32.4	27.8	27.8	27.6	27.4	28	27.7	27.6	27.6	27.6	28.1	28	28
P. koreensis JCM 14769	GCA_014646955	23.6	22.5	23.4	23	22.6	23.4	23.4	23.4	24.1	24	23.9	23.4	24.7	24.5	26.7	24.8	25.4	25.7	26.2	25.8	26.4	26.5	26.8	26.6	27.1	34.6	34.3	34.1	33.1	33	33.1	100	34.8	35.2	35.3	33.9	28.3	28.9	28.4	28.6	28.9	28.7	28.4	28.4	28.6	29	28.6	28.9
P. atagonensis PS14	GCA_011369485	23.3	22.2	23	22.7	22.6	23	23.2	23	24	23.4	23.6	23.2	24.2	23.9	26	24	24.7	24.9	25.7	25.4	25.7	25.9	26.2	26	26.3	34.2	34	34.1	33	32.8	33	34.8	100	35.5	35.3	34.4	27.9	28.4	28.3	28.1	28.6	28.5	28.1	28	28.1	28.8	28.5	28.5
P. neuropathica P155 T	GCF_015461835	23.4	22.4	23.1	22.7	22.6	23.1	23.3	23.3	23.7	23.6	23.5	23.1	24.1	23.9	25.8	24.1	24.6	24.8	25.3	24.9	25.6	25.8	25.9	25.8	26	33.2	32.7	32.5	34.3	33.5	33.7	35.2	35.5	100	36.3	34.6	27.8	27.9	28	27.9	28.1	28.2	28	27.9	27.7	28.1	28.1	28.2
P. baetica LMG 25716	GCA_002813455	23.5	22.7	23.1	23.2	22.9	23.4	23.4	23.4	23.8	23.8	23.9	23.1	24.6	24.3	26.1	24.4	25.1	25.2	25.7	25.2	25.9	26	26.1	26.1	26.1	33.8	33.3	33.1	33	32.9	33.1	35.3	35.3	36.3	100	36.7	28.1	28.4	28.3	28.4	28.5	28.6	28.4	28.3	28.1	28.5	28.5	28.6
P. iridis P42	GCA_017973755	23.4	22.2	22.9	22.8	22.7	23.1	23.1	23.1	23.6	23.4	23.4	23.2	24.1	23.7	25.7	23.9	24.6	24.7	25.4	25	25.6	25.6	25.8	25.7	26.2	32.7	32.5	32.5	32	32	32.4	33.9	34.4	34.6	36.7	100	27.8	28	28.1	28.1	28.5	28.4	28.1	27.9	27.7	28.3	28.1	28.2
P. prosekii LMG 26867	GCA_900105155	23.9	23	23.5	23.2	23.3	23.6	23.9	23.7	24.4	23.9	24.1	23.5	24.4	24.4	26.4	24.5	25.3	25.4	25.7	25.4	26.3	26.2	26.3	26.4	26.6	29	28.4	28.4	27.5	27.7	27.8	28.3	27.9	27.8	28.1	27.8	100	30.7	30.8	30.9	31.1	31.6	31.3	31.2	28.6	29.2	29.1	29.2
P. silesiensis A3	GCA_001661075	23.9	22.7	23.6	23.4	23.1	23.9	23.7	24	24.5	23.9	24.1	23.6	25.1	24.8	27.5	25.4	26.4	26.3	26.9	26.4	27.4	27.3	27.5	27.5	27.6	29.7	29.4	29.2	27.6	27.8	27.8	28.9	28.4	27.9	28.4	28	30.7	100	34	32.6	34.1	35.8	34.5	33.3	29.5	31.1	30.7	31.3
P. lini DSM 16768	GCF_001042905	23.8	22.5	23.5	23.3	23.1	23.8	23.7	23.8	24.1	23.9	24.2	23.8	24.6	24.6	27	24.7	25.5	25.7	26.5	25.9	27.1	27	27.1	27.1	27.4	29.4	29.1	29	27.5	27.4	27.6	28.4	28.3	28	28.3	28.1	30.8	34	100	32.8	34	35.9	34.3	33.2	29.3	30.9	30.9	31
P. mucoides P154aT	GCF_015461845	23.4	22.3	23.3	22.8	22.6	23.2	23.4	23.4	23.9	23.8	23.8	23.3	24.2	24.2	26.4	24.2	25	24.6	26.1	25.8	26.7	26.5	26.6	26.7	27	28.8	28.6	28.7	27.4	27.4	27.4	28.6	28.1	27.9	28.4	28.1	30.9	32.6	32.8	100	33.4	34.2	35.4	33.9	29.2	30.9	30.8	31.1
P. migulae NBRC 103157	GCA_002091715	23.6	22.9	23.7	23.2	23.1	23.7	23.6	23.7	24.2	23.8	24.2	23.5	24.3	24.6	27	24.9	25.6	25.5	26.4	26.2	27	26.7	27	27.1	27.2	29.8	29.3	29.3	27.8	27.8	28	28.9	28.6	28.1	28.5	28.5	31.1	34.1	34	33.4	100	35.7	35.3	34.3	29.7	31	31	31.1
P. frederiksbergensis LMG 19851	GCF_900105495	23.7	22.9	23.5	23.3	23	23.8	23.6	23.8	24.2	23.8	24.3	23.8	24.6	24.6	27.1	24.8	25.9	25.8	26.3	26.1	27.2	27	27.3	27.4	27.4	29.5	29.1	29.4	27.8	27.8	27.7	28.7	28.5	28.2	28.6	28.4	31.6	35.8	35.9	34.2	35.7	100	36.5	35	29.7	31.7	31.6	31.7
P. mandelii LMG 21607	GCA_900106065	23.8	22.7	23.7	23.2	23.1	23.7	23.9	23.8	24.4	23.9	24.4	24.1	24.5	24.7	26.7	24.5	25.5	24.9	26.4	26	27	26.9	26.8	26.9	27.2	29.4	28.9	29	27.4	27.6	27.6	28.4	28.1	28	28.4	28.1	31.3	34.5	34.3	35.4	35.3	36.5	100	37.3	29.3	31.1	30.7	30.9
P. arsenicoxydans CECT 7543	GCA_900103875	23.6	22.4	23.1	22.9	22.8	23.5	23.7	23.5	24.3	23.7	23.9	23.6	24.2	24.3	26.4	24.3	25.3	25.3	26.3	25.9	26.9	26.8	26.8	26.8	27	29	28.6	28.7	27.5	27.6	27.6	28.4	28	27.9	28.3	27.9	31.2	33.3	33.2	33.9	34.3	35	37.3	100	29.2	30.7	30.7	30.8
P. vancouverensis LMG 20222	GCF_900105825	23.4	22.5	23.1	22.8	22.7	23.2	23.3	23.4	24	23.6	23.9	23.1	24.6	24.5	26.8	24.8	25.6	25.6	26.5	26	26.5	26.6	26.6	26.9	26.9	28.9	28.9	28.9	27.6	27.9	27.6	28.6	28.1	27.7	28.1	27.7	28.6	29.5	29.3	29.2	29.7	29.7	29.3	29.2	100	32.9	32.7	32.9
P. laurylsulfatiphila AP3 16	GCA_002934665	23.7	22.7	23.5	23.1	23	23.7	23.5	23.6	24.2	23.9	24.1	23.4	25.1	25	27.4	25.6	26.3	26.1	26.8	26.3	27	27.1	27.4	27.3	27.5	30	29.7	29.4	27.9	28	28.1	29	28.8	28.1	28.5	28.3	29.2	31.1	30.9	30.9	31	31.7	31.1	30.7	32.9	100	46	45.8
P. laurylsulfativorans AP3 22	GCA_002906155	23.6	22.5	23.3	23	22.8	23.6	23.4	23.3	24.1	23.6	24	23.5	24.8	24.8	27.2	25.1	25.9	25.8	26.6	26.2	26.8	26.7	27	27.1	27.2	29.7	29.5	29.2	27.9	28	28	28.6	28.5	28.1	28.5	28.1	29.1	30.7	30.9	30.8	31	31.6	30.7	30.7	32.7	46	100	46.3
P. jessenii DSM 17150	GCA_002236115	23.4	22.6	23.6	23.2	23.1	23.8	23.4	23.5	24	23.7	24	23.5	25	24.8	27.3	25.4	26.1	26	26.5	26	26.8	26.8	26.9	27	27	29.9	29.7	29.4	28	28	28	28.9	28.5	28.2	28.6	28.2	29.2	31.3	31	31.1	31.1	31.7	30.9	30.8	32.9	45.8	46.3	100
P. umsongensis DSM 16611	GCA_002236105	23.4	22.5	22.9	22.8	22.9	23.3	23.3	23.4	24.1	23.6	23.7	23.3	25	24.7	27	25	25.8	25.8	26.7	26.3	26.7	27	27	27	27.2	29.2	29	28.9	27.6	27.7	27.7	28.9	28.2	27.8	27.9	27.7	29	30.9	30.8	30.3	30.9	31.2	30.7	30.6	29.7	32	31.6	32
P. moorei DSM 12647	GCF_900102045	23.8	22.8	23.3	23.1	23.1	23.5	23.7	23.6	24.3	23.7	24	23.6	24.9	24.8	27	25	25.9	25.8	26.8	26.3	26.9	27	27.4	27.3	27.4	29.5	29.3	29.2	27.8	28	27.8	28.7	28.3	28	28.4	28	29.5	31.5	31.2	30.8	31.5	31.6	31.4	31.3	30.4	32.2	32.1	32.4
P. mohnii DSM 18327	GCA_900105115	23.5	22.5	23.1	22.9	22.9	23.5	23.7	23.6	24	23.7	24	23.3	24.9	24.7	27	24.8	25.7	25.8	26.7	26.4	26.9	27.1	27.3	27.3	27.3	29.3	29.2	29	27.8	27.9	28	28.6	28.3	27.9	28.3	27.9	29.5	31.4	31.3	30.9	31.5	32	31.5	31.1	30.2	32	32.1	32.2
P. reinekei MT1	GCA_001945365	23.3	22.1	23.1	22.7	22.7	23	23.1	23.3	24.1	23.6	23.8	23.2	24.1	24.3	26.7	24.4	25.2	25.2	26.3	25.9	26.6	26.6	26.9	26.9	27.1	29.1	29	29.1	27.7	27.8	28	28.7	28.5	28.3	28.6	28	29.4	30.9	30.9	30.7	31.2	31.7	31.1	30.6	30.4	32.5	32.4	32.9
P. izuensis IzPS43 3003	GCA_009861505	23.4	22.5	23.5	23.1	23.1	23.5	23.3	23.4	24	23.5	23.9	23.3	24.7	24.8	27.1	25.2	25.9	25.9	26.4	26	26.7	26.7	27	26.9	27	29.7	29.3	29	27.5	27.6	27.7	28.7	28.3	27.6	28.2	27.7	29.2	31	31.1	30.8	31.1	31.9	31	30.6	30.3	32.1	32.3	32.2
P. yamanorum LMG 27247	GCA_900105735	23.4	22.4	23	22.9	22.7	23.1	23.3	23.4	24	23.3	23.6	23.1	24.2	24.2	26	24.2	25	25	25.3	24.7	25.2	25.4	25.4	25.4	25.6	25.1	25.1	24.9	24.6	24.9	24.8	25	24.6	24.6	24.9	24.7	25.5	26.1	25.8	25.4	25.7	25.9	25.8	25.4	25.3	25.6	25.3	25.6
P. karstica CCM 7891	GCA_009707515	22.8	22	22.6	22.6	22.3	22.7	23	22.9	23.5	23.1	23.2	22.8	23.5	23.6	25.3	23.6	24.5	24.5	24.6	24.4	24.7	25	25.1	25.2	25.3	24.1	24.2	24.3	24.4	24.3	24.2	24.6	24.1	24.2	24.4	24	25	25.5	25.1	24.8	25.3	25.2	25.2	24.9	24.6	25.3	25	25.2
P. spelaei CCM 7893	GCA_009724245	23.1	22.1	22.7	22.6	22.5	23	23.2	23.2	23.7	23.3	23.4	23	23.9	24.1	25.7	23.9	24.6	24.7	24.9	24.5	24.9	25.1	25.2	25.1	25.4	24.7	24.8	24.6	24.6	24.7	24.7	24.9	24.6	24.4	24.7	24.6	25.3	25.8	25.5	25.3	25.6	25.8	25.5	25.3	25	25.4	25.3	25.4
P. mucidolens LMG 2223	GCA_900106045	22.8	22.1	22.7	22.5	22.5	22.8	22.9	22.8	23.7	23	23.3	22.9	24	23.7	25.4	23.9	24.6	24.5	24.7	24.5	24.8	25.2	25.1	25.1	25.1	24.5	24.5	24.6	24.5	24.5	24.4	24.6	24.1	24.4	24.6	24.3	25.2	25.6	25.3	24.8	25.6	25.5	25.5	25.1	24.8	25.3	25	25.1
P. gessardii DSM 17152	GCF_001983165	23.2	22.5	23.4	22.9	22.8	23.3	23.3	23.2	24.1	23.6	23.6	23.1	24.6	24.7	26.4	24.8	25.5	25.5	25.3	24.9	25.2	25.6	25.7	25.7	25.8	25.1	25	25	24.8	24.9	24.7	25.1	24.6	24.6	24.8	24.5	25.2	26	25.4	26.6	25.7	25.6	26.3	25.3	25.2	25.5	25.4	25.6
P. proteolytica LMG 22710	GCF_900105955	23.2	22.7	23.8	23.1	23	23.4	23.6	23.4	24.3	23.6	24	23.5	24.7	24.6	26.3	24.7	25.5	25.6	25.2	24.8	25.4	25.5	25.6	25.6	26	25.3	25	25.2	25	25	24.9	25.1	24.8	24.5	24.9	24.7	25.6	26	25.5	25.3	25.8	25.8	25.9	25.3	25.3	25.6	25.3	25.3
P. brenneri JCM 13307	GCA_014646715	23	22.3	23.2	22.9	22.6	23	23.2	23.3	24	23.6	23.5	23.1	24.4	24.3	26.2	24.4	25.1	25.1	25.3	24.8	25.3	25.4	25.5	25.5	25.8	25	25	24.9	24.6	24.8	24.8	25	24.6	24.3	24.6	24.5	25.2	25.8	25.3	25.1	25.5	25.5	25.4	25.3	24.8	25.3	25.2	25.4
P. rhodesiae LMG 17764	GCF_900105575	23.1	22.3	22.7	22.5	22.3	22.5	23	23	23.8	23	23.4	22.7	24	24	25.3	23.9	24.7	25	24.9	24.6	24.8	25.2	25	25.1	25.2	24.4	24.4	24.6	24.5	24.7	24.6	24.7	24.3	24.2	24.4	24.3	24.9	25.2	24.8	24.7	25	25.1	25.1	24.7	24.6	24.9	24.9	25
P. poae LMG 21465	GCA_001730605	23.3	22.4	23.1	22.9	22.7	23.3	23.3	23.2	24.1	23.6	23.6	23.3	24.5	24.1	25.8	24.4	25.2	25.1	25	24.9	25.2	25.2	25.3	25.2	25.6	24.9	25.1	25.2	24.8	25.2	25	25.1	24.7	24.6	25	24.7	25.4	25.8	25	24.9	25.1	25.5	25.5	25.3	25.2	25.5	25.4	25.4
P. trivialis LMG 21464	GCA_001730655	23.4	22.4	22.8	22.8	22.4	23	23.3	23.3	24.2	23.4	23.6	23.3	24.5	24.1	26	24.4	25.3	25.5	25.1	24.9	25.2	25.5	25.5	25.5	25.7	25.1	25.2	25.2	25.1	25.2	25.2	25.4	24.9	24.8	25.2	24.8	25.5	25.8	25.2	25	25.4	25.7	25.5	25.5	25.3	25.5	25.3	25.4
P. orientalis DSM 17489	GCF_001439815	23.3	22.5	23	22.8	22.6	23.2	23.1	23.3	23.7	23.2	23.5	22.8	24.3	24.1	26	24.3	25	25.1	24.9	24.6	25	25.2	25.1	25.2	25.4	24.9	25	25	24.4	24.7	24.7	24.9	24.4	24.5	24.6	24.4	25.1	25.6	25.1	25	25	25.3	25.1	25	25	25.3	24.9	25
P. haemolytica DSM 108987T	GCF_009659625	23	22.2	22.6	22.4	22.3	22.8	22.8	22.8	23.6	23	23.1	22.9	23.8	23.8	25.2	23.9	24.4	24.6	24.6	24.3	24.7	24.7	25	25	25.2	24.3	24.4	24.3	24.2	24.3	24.4	24.7	24.4	24.3	24.3	24.2	24.8	25.3	25	24.6	24.9	25.1	24.9	24.6	24.6	25	24.9	25
P. synxantha DSM 18928	GCF_001439725	23	22	22.9	22.8	22.9	23	23	23	23.6	23.2	23	22.6	24.1	24.1	25.4	24.1	24.6	24.7	24.7	24.4	24.8	24.9	25	25	25.1	24.5	24.6	24.6	24.3	24.3	24.3	24.6	24.1	24	24.4	24.1	24.8	25.3	25	24.6	24.8	25	24.7	24.5	24.6	25	24.8	24.8
P. libanensis DSM 17149	GCF_001439685	23	22.1	22.5	22.8	22.4	22.8	22.9	22.8	23.6	23	23.1	22.7	24.1	24.1	25.5	24.1	24.6	24.7	24.8	24.5	24.9	25	25.1	25	25.2	24.5	24.5	24.5	24.3	24.3	24.4	24.6	24.2	24.1	24.2	24.1	24.8	25.3	25	24.7	25	25.1	25	24.5	24.8	25	24.8	24.9
P. paralactis DSM 29164	GCF_001439735	23	22.1	22.9	22.8	22.5	23	22.9	23	23.5	23.1	23.2	22.8	24	24	25.3	24.1	24.6	24.7	24.7	24.2	24.8	25	25	24.9	25.1	24.7	24.5	24.5	24.3	24.5	24.4	24.8	24.3	24.2	24.2	24.5	24.8	25.2	24.9	24.7	24.9	25.2	24.9	24.8	24.7	24.9	24.7	24.8
P. lactis DSM 29167	GCF_001439845	23.1	22.2	23.1	22.8	22.8	23	22.9	23	23.6	23.2	23.3	23	24.1	24	25.6	24.3	24.7	24.8	24.8	24.5	24.9	25.1	25.3	25.2	25.4	24.8	24.7	24.6	24.6	24.5	24.6	24.7	24.4	24.4	24.3	24.3	25	25.4	25.1	25	25.1	25.2	25.2	25	24.9	25.2	24.9	25.1
P. paracarnis V5/DAB/2/5	GCA_904063055	23.1	22.2	22.8	22.7	22.3	22.7	22.9	23	23.5	22.9	23.2	22.8	24.2	23.9	25.5	24.2	24.7	24.9	24.7	24.4	24.9	25.1	25	25.1	25.2	24.5	24.5	24.5	24.3	24.4	24.6	24.7	24.3	24.2	24.4	24.2	24.9	25.2	24.9	24.8	25	25	24.9	24.8	24.8	25	24.9	25
P. carnis B4-1T	GCA_902329575	23.1	22.2	22.9	22.7	22.4	23	23	23.1	23.5	23.2	23.2	22.8	24.1	23.9	25.5	24.2	24.9	24.9	24.9	24.5	24.8	25.1	25.1	25.2	25.3	24.6	24.5	24.5	24.3	24.4	24.5	24.8	24.2	24.3	24.3	24.4	24.8	25.3	24.9	24.8	25	25	25	24.9	24.9	25.2	24.8	24.9
P. palleroniana LMG 23076	GCA_003031675	23	22	22.4	22.5	22.2	22.7	22.9	22.9	23.5	23	23.1	22.8	23.8	24	25.5	23.9	24.4	24.7	24.5	24.2	24.6	24.9	25	25	25.2	24.5	24.5	24.5	24.4	24.5	24.5	24.7	24.3	24.3	24.5	24.2	24.8	25.3	24.8	24.6	24.8	25.1	25	24.6	24.7	25.1	24.9	25.1
P. tolaasii NCPPB 2192	GCA_002813445	23.1	22.4	23	22.9	22.7	23	23.1	23.1	23.6	23.3	23.5	23	23.9	24.1	25.7	24.2	24.7	24.9	24.4	24.2	24.6	24.9	25	25.1	24.9	24.8	24.7	24.9	24.6	24.8	24.7	24.8	24.5	24.4	24.4	24.5	25	25.4	25	25	25.1	25.3	25.1	25	24.9	24.9	24.9	25
P. costantinii LMG 22119	GCF_001870435	23.2	22.4	22.6	22.7	22.6	22.8	23	22.9	23.7	23.3	23.3	22.9	23.8	23.8	25.3	23.4	24.3	24.6	24.5	24.4	24.7	25	25	25.1	25.1	24.4	24.4	24.7	24.5	24.7	24.6	24.9	24.3	24.6	24.7	24.5	25.3	25.6	25.2	24.8	25.2	25.4	25.3	25	24.7	25.1	25	25.3
P. kitaguniensis MAFF 212408T	GCF_009296165	23.2	22	22.6	22.6	22.3	22.8	23	22.8	23.6	23.1	23.3	22.8	23.5	23.5	24.9	23.4	24	24.2	24.1	24	24.3	24.4	24.6	24.6	25	24.3	24.3	24.3	24.3	24.4	24.4	24.7	24	24.4	24.2	24.3	25	25.2	24.9	24.8	24.9	25	24.9	24.7	24.6	24.7	24.7	24.7
P. antarctica LMG 22709	GCF_900103795	23.2	22.3	22.7	22.6	22.4	22.9	23.1	22.8	23.7	23	23.3	22.9	23.7	23.7	25.3	23.6	24.2	24.5	24.2	24.1	24.6	24.9	24.8	24.8	25	24.6	24.5	24.5	24.4	24.6	24.4	24.6	24.1	24.1	24.4	24.2	25.1	25.1	25.1	24.8	25	25.2	25	24.8	24.6	24.9	24.9	24.8
P. fluorescens DSM 50090	GCA_001269845	23.2	22.2	22.7	22.7	22.5	22.9	23	22.8	23.5	22.9	23.3	22.7	24	23.8	25.3	23.9	24.3	24.4	24.5	24.1	24.4	24.6	24.6	24.7	25	24.5	24.3	24.4	24.3	24.5	24.5	24.6	24.2	24.2	24.2	24.3	24.7	25.3	24.9	24.7	24.9	25	24.9	24.6	24.6	25	24.9	25
P. edaphica RD25	GCA_005863185	23.8	22.7	23	23.2	22.9	23.3	23.5	23.4	24.1	23.7	23.8	23.3	24	24.2	25.7	24.1	24.9	24.9	24.8	24.8	25.1	25.3	25.2	25.2	25.5	25	25	25.1	24.7	25	24.9	25.3	24.8	24.7	24.7	24.8	25.6	25.6	25.4	25.3	25.4	25.6	25.6	25.3	25.2	25.5	25.3	25.3
P. salomonii LMG 22120	GCA_001730645	23.3	22.5	22.8	22.9	22.7	23	23.3	23.3	24.1	23.2	23.6	23.2	23.9	24	25.5	23.7	24.6	24.7	24.5	24.3	24.6	25.2	25.1	25.2	25.4	24.8	24.8	24.8	24.6	24.6	24.8	24.9	24.6	24.4	24.6	24.5	25.4	25.6	25.2	25.2	25.2	25.4	25.3	25.1	25.1	25.2	25.1	25.3
P. aylmerensis S1E40	GCA_001702265	23.4	22.4	23	23	22.5	23	23.2	23.2	24.1	23.5	23.4	23.2	24.4	24.2	26.1	24.5	25.1	25.2	25.2	24.8	25.1	25.4	25.6	25.5	25.7	25.2	25	25.1	24.8	25	25	25.3	24.8	24.6	24.9	24.8	25.3	25.8	25.5	25	25.4	25.5	25.4	25	25.2	25.5	25.4	25.4
P. fildesensis KG01	GCA_001050345	23.3	22.4	22.7	23	22.6	23.1	23.1	23.1	23.9	23.3	23.7	23.1	24.3	23.9	25.6	24.1	24.8	24.8	25	24.6	25.1	25.1	25.3	25.1	25.3	24.9	24.8	24.9	24.7	24.8	24.7	25.1	24.7	24.5	24.7	24.6	25.6	25.8	25.3	25.2	25.5	25.5	25.5	25.2	25.1	25.4	25.3	25.5
P. extremaustralis 14-3	GCA_000242115	23.3	22	22.6	22.7	22.2	23	22.9	23	23.6	23.3	23.3	22.8	24.4	24	25.9	24.4	25.2	25	25.4	24.8	25.1	25.4	25.6	25.5	25.6	24.9	25.1	25.2	24.8	25	25.1	25.3	24.6	24.8	24.9	24.6	25.2	25.7	25.4	25.1	25.4	25.6	25.4	25.3	25	25.6	25.4	25.7
P. veronii DSM 11331	GCF_001439695	23.4	22.5	23.3	22.7	22.7	23.1	23.1	23.1	24.1	23.3	23.6	23.5	24.6	24.4	26.2	24.6	25.4	25.3	25.4	24.9	25.3	25.6	25.5	25.6	25.8	25.2	25.2	25.2	25	25.2	25.2	25.5	24.9	24.9	25.1	24.8	25.4	26.1	25.7	26.2	26	25.9	26.7	25.4	25.3	25.8	25.6	25.7
P. lactucae MAFF 301380T	GCF_016937615	23.4	22.2	22.8	22.7	22.6	22.9	23	23.1	24	23.2	23.1	23	24.3	24.1	25.8	24.3	25.1	25	25	24.7	25.3	25.4	25.6	25.6	25.7	24.6	25	25	24.9	24.9	24.9	25.3	24.7	24.6	25.1	24.7	25.4	25.7	25.3	25.2	25.4	25.5	25.4	25.1	25.2	25.7	25.3	25.5
P. grimontii DSM 17515	GCF_900101085	23.5	22.5	22.9	22.8	22.6	23.1	23.3	23.3	24	23.4	23.6	23.1	24.4	24.2	25.9	24.3	25.2	25.1	25.1	24.5	25.2	25.4	25.3	25.4	25.5	25.2	25	25.2	24.8	25	24.9	25.3	24.8	24.6	25.1	24.7	25.3	26	25.3	26.1	25.8	25.5	26.3	25.2	25.3	25.6	25.4	25.7
P. sivasensis P7	GCA_013778505	22.7	21.9	22.6	22.4	22.1	22.6	22.9	22.8	23.3	22.8	23	22.7	23.7	23.5	25.2	23.6	24.2	24.3	24.5	23.9	24.4	24.5	24.5	24.5	24.6	24.3	24.3	24.5	24.1	24.2	24.1	24.5	24.1	24	24.3	24.5	24.6	25.1	24.8	24.7	24.8	24.9	24.7	24.6	24.4	24.7	24.7	24.8
P. kairouanensis KC12T	GCA_004682055	23.2	22.3	22.9	22.6	22.7	22.9	23.1	23.1	23.4	23.2	23.4	23.1	24.1	24.1	25.7	24.4	25	25	24.8	24.4	24.9	24.8	24.9	25	25.1	25	24.9	24.7	24.4	24.4	24.4	24.9	24.4	24.4	24.6	24.2	24.9	25.3	25.1	24.8	25.1	25.1	25	24.8	25	25.2	25	25.1
P. pisciculturae P115 T	GCF_015461805	22.9	22.5	22.8	22.7	22.5	22.9	22.9	23.1	23.5	23.3	23.4	22.8	23.7	23.8	25.3	23.9	24.5	24.5	24.4	24.1	24.4	24.5	24.7	24.6	24.7	24.6	24.6	24.4	24.1	24.4	24.3	24.6	24.3	24.3	24.2	24.3	24.6	25.1	24.7	24.4	24.7	25	24.7	24.7	24.6	24.8	24.6	24.7
P. cremoris WS 5106T	GCF_014230465	22.8	22.1	22.8	22.7	22.3	22.7	22.8	22.7	23.3	23	23.1	22.7	23.8	23.7	25.2	23.9	24.4	24.5	24.5	24.2	24.6	24.6	24.7	24.7	24.8	24.6	24.5	24.5	24.3	24.4	24.5	24.8	24.4	24.3	24.5	24.3	24.9	25.2	24.9	24.6	24.9	25.1	24.8	24.6	24.5	25	24.9	24.9
P. nabeulensis E10BT	GCA_004682045	23.1	22.3	23	22.8	22.5	23	23	23	23.5	23.3	23.3	23	24	24.1	25.8	24.2	24.8	25	24.9	24.7	24.8	24.9	25.2	25.1	25.2	24.9	25	24.6	24.7	24.7	24.7	25	24.6	24.5	24.6	24.6	25	25.5	25.1	24.9	25.1	25.2	25.2	25	25	25.3	25.2	25.4
P. cedrina DSM 17516	GCF_001983175	23.3	22.3	23.1	22.9	22.5	23.1	23.2	23.2	23.7	23.2	23.4	22.9	24.4	24.2	25.9	24.6	25.2	25.1	24.9	24.6	25.1	25.2	25.1	25.1	25.2	25.1	24.9	24.8	24.6	24.8	24.8	25	24.7	24.5	25.1	24.8	25.2	25.5	25.1	24.9	25.1	25.3	25.2	25.2	25	25.3	25.1	25.4
P. lurida LMG 21995	GCA_002563895	23.2	22.1	22.9	22.7	22.3	22.9	23	22.8	23.8	23.2	23.3	22.9	24.3	24	25.6	24	24.7	24.9	25	24.6	25	25.4	25.3	25.2	25.3	24.8	24.7	24.8	24.8	24.7	24.6	24.9	24.5	24.4	24.6	24.4	25.1	25.4	25.1	24.8	25	25.5	25.2	24.8	24.8	25.1	25.1	25.1
P. marginalis ICMP 3553	GCA_001645105	23.1	22.2	22.8	22.6	22.5	23	23	23	23.7	23.1	23.3	23	24.1	24	25.7	24.1	24.8	24.8	25	24.5	24.7	25.1	25.2	25.2	25.2	24.8	24.8	24.6	24.5	24.7	24.6	24.9	24.5	24.5	24.6	24.6	25	25.6	25.2	25	25.1	25.4	25.2	25	24.9	25.4	25.1	25.3
P. canadensis 2-92	GCF_000503215	23	22.1	22.8	22.7	22.7	23	23.1	23.1	23.6	23.1	23.3	23	23.9	23.9	25.6	23.9	24.6	24.7	24.8	24.5	24.8	25.1	25	25.2	25.4	24.5	24.8	24.8	24.7	24.7	24.9	24.9	24.6	24.6	24.8	24.4	25.3	25.6	25.1	24.8	25.3	25.4	25.3	24.9	24.9	25.3	25.1	25.3
P. simiae CCUG 50988	GCA_001730615	23.2	22.3	23	22.8	22.7	23.1	23	23	23.8	23.3	23.3	22.9	24.1	24	25.6	24.1	24.5	24.7	24.9	24.6	24.8	24.9	25	25.1	25.3	24.6	24.6	24.7	24.6	24.7	24.6	24.8	24.5	24.4	24.7	24.4	25	25.5	25.2	24.8	25.1	25.3	25.1	24.9	24.8	25.1	24.9	25.1
P. extremorientalis LMG 19695	GCF_001870465	23.3	22.1	22.6	22.7	22.5	22.8	23.1	22.9	23.8	23.4	23.3	23	24.1	24	25.8	24.2	24.9	24.9	25	24.7	24.9	25.2	25.2	25.3	25.3	24.6	24.9	24.9	24.6	24.8	24.9	25.1	24.6	24.5	24.6	24.5	25.2	25.6	25.1	25	25.3	25.5	25.2	25	24.9	25.4	25.2	25.4
P. allii MAFF 301514	GCA_013392005	23.1	22.2	22.9	23	22.6	23.1	23.2	23.2	23.9	23.4	23.4	23.1	24.5	24	26	24.3	24.9	25.1	25.1	24.8	25.2	25.3	25.3	25.5	25.6	25.1	25	25	25	24.8	24.9	25.3	24.8	24.7	24.8	24.7	25.2	25.6	25.4	25.3	25.3	25.5	25.5	25.2	25.2	25.6	25.4	25.6
P. azotoformans LMG 21611	GCA_900103345	23.1	22.4	23	22.8	22.7	23.1	23.3	23.1	23.8	23.2	23.4	22.9	24.4	24.2	26	24.2	25	25.1	25.1	24.6	25.2	25.4	25.4	25.5	25.6	25.2	25.1	25	24.9	24.9	24.8	25.3	24.8	24.7	24.8	24.7	25.2	25.7	25.4	25.1	25.3	25.6	25.4	25.4	25.1	25.4	25.3	25.4
[truncated: 50 more columns]
